# Supplementary material for: LMO1 polymorphisms reduce neuroblastoma risk in Chinese children: a two-center case-control study
Source: PubMed Central journal article supplement (PMC5630358; doi:10.18632/oncotarget.20018), 2017-08-07
Supplement: oncotarget-08-65620-s001.pdf [file oncotarget-08-65620-s001.pdf]

## ***LMO1* polymorphisms reduce neuroblastoma risk in Chinese children: a two-center case-control study**

### SUPPLEMENTARY MATERIALS

**Supplementary Table 1: Frequency distribution of selected characteristics in neuroblastoma patients and controls**

| Variables        | Cases ( <i>n</i> = 118) |       | Controls ( <i>n</i> = 281) |       | <i>P</i> <sup>a</sup> |
|------------------|-------------------------|-------|----------------------------|-------|-----------------------|
|                  | No.                     | %     | No.                        | %     |                       |
| Age range, month | 0–131.1                 |       | 0.1–144.0                  |       | 0.189                 |
| Mean ± SD        | 46.24 ± 29.98           |       | 44.97 ± 33.23              |       |                       |
| ≤ 18             | 23                      | 19.49 | 72                         | 25.62 | 0.196                 |
| > 18             | 95                      | 80.51 | 209                        | 74.38 |                       |
| Gender           |                         |       |                            |       | 0.196                 |
| Female           | 54                      | 45.76 | 109                        | 38.79 |                       |
| Male             | 64                      | 54.24 | 172                        | 61.21 |                       |
| Clinical stage   |                         |       |                            |       |                       |
| I                | 15                      | 12.82 |                            |       |                       |
| II               | 31                      | 26.50 |                            |       |                       |
| III              | 19                      | 16.24 |                            |       |                       |
| IV               | 49                      | 41.88 |                            |       |                       |
| 4 s              | 3                       | 2.56  |                            |       |                       |
| Site of origin   |                         |       |                            |       |                       |
| Adrenal gland    | 89                      | 75.42 |                            |       |                       |
| Mediastinum      | 19                      | 16.10 |                            |       |                       |
| Other region     | 10                      | 8.47  |                            |       |                       |

<sup>a</sup>Two-sided  $\chi^2$  test for distributions between neuroblastoma patients and controls.

**Supplementary Table 2: Information on the four *LMO1* polymorphisms predicted by SNPinfo software**

| rs         | Chromosome | Position | Region | Allele | TFBS | Splicing | miRNA | Allele | Asian | CHB   |
|------------|------------|----------|--------|--------|------|----------|-------|--------|-------|-------|
| rs110419   | 11         | 8209429  | intron | A/G    | —    | —        | —     | A      | 0.634 | 0.53  |
| rs4758051  | 11         | 8195215  | intron | A/G    | —    | —        | —     | G      | 0.528 | 0.518 |
| rs10840002 | 11         | 8199602  | intron | A/G    | —    | —        | —     | A      | 0.500 | 0.47  |
| rs204938   | 11         | 8234773  | intron | T/C    | —    | —        | —     | C      | 0.211 | 0.179 |

TFBS, transcription factor binding sites; CHB, Han Chinese in Beijing, China.
